# Supplementary material
Source: Research Square preprint supplement (doi:10.21203/rs.3.rs-8610618/v1)
Supplement: Supplementary file 1 [file 5a4b82957ad937dc220a09d7.docx]

| Covariates | Categories | Frequency (n) | Percentage (%) |
| --- | --- | --- | --- |
| Sex | Female | 1579 | 65.71 |
| Male | 824 | 34.29 |
| Weight of the individual | Less or equal to mean weight | 1242 | 51.69 |
| Above mean weight | 1161 | 48.31 |
| Treatment of seizures | Placebo | 1215 | 50.56 |
| Progabide | 1188 | 49.44 |
| Residence | Urban | 1845 | 76.99 |
| Rural | 558 | 23.01 |
| Education | Illiterate | 1421 | 59.13 |
| Literate | 982 | 40.87 |
| Occupation | Employment | 907 | 37.75 |
| Unemployment | 1496 | 62.25 |
| Family History | Yes | 961 | 40.00 |
| No | 1442 | 60 |
| Alcohol Use | Yes | 1109 | 46.15 |
| No | 1294 | 53.85 |
| TBI | Yes | 864 | 35.96 |
| No | 1539 | 64.04 |
| Stroke | Yes | 435 | 18.10 |
| No | 1968 | 81.90 |
| Fever | Yes | 984 | 40.95 |
| No | 1419 | 59.05 |
| Head trauma | Yes | 654 | 27.22 |
| No | 1749 | 72.78 |
| Stress | Yes | 925 | 38.49 |
| No | 1478 | 61.51 |
| Uremia | Yes | 578 | 24.05 |
| No | 1825 | 75.95 |
| Brain infections | Yes | 693 | 28.84 |
| No | 1710 | 71.16 |

Appendix A

Table 1: Sociodemographic, Behavioral, and Clinical Characteristics of Epilepsy Patients at Baseline (N = 2,403)

Table 2: Comparison of Fixed-Effects and Mixed-Effects Models for Longitudinal Seizure Count Data

| Fixed-Effects Models | LL | AIC | BIC | Deviance | ΔAIC | ICC | (χ²/df) |
| --- | --- | --- | --- | --- | --- | --- | --- |
| Poisson Fixed Effects | -2671.05 | 9122.40 | 9195.60 | 5342.10 |  |  | 3.67 |
| Negative Binomial Fixed Effects | -2437.55 | 7465.70 | 7546.50 | 4875.10 |  |  | 1.52 |
| Mixed-Effects Models | LL | AIC | BIC |  | ΔAIC | ICC |  |
| Poisson GLLM (RI) | -4257.45 | 8628.40 | 8755.20 | 8514.90 | -1167.3 | 0.22 |  |
| Poisson GLLM(RI+RS) | -3917.40 | 7959.10 | 8089.40 | 7834.80 | -669.30 | 0.13 |  |
| Negative Binomial (RI) | -2814.10 | 5745.60 | 5878.20 | 5628.20 | -2882.8 | 0.13 |  |
| Negative Binomial (RI+RS) | -1215.95 | 5419.33 | 5492.94 | 2431.90 | -326.27 | 0.09 |  |
| Zero-Inflated NB (RI+RS) | -1210.11 | 5398.21 | 5512.76 | 2420.21 | -21.12 | 0.08 |  |

Table 3: Cross-Validated Predictive Performance of Poisson and Negative Binomial Models for Seizure Counts

| Model | Mean LL | SE (LL) | RMSE | MAE | Pseudo-R² | Calibration Slope |
| --- | --- | --- | --- | --- | --- | --- |
| Poisson Fixed Effects | -2712.34 | 45.67 | 8.91 | 6.23 | 0.38 | 0.92 |
| Negative Binomial Fixed Effects | -2489.21 | 38.92 | 7.45 | 5.12 | 0.51 | 0.95 |
| Poisson GLMM (RI only) | -4298.56 | 67.34 | 7.89 | 5.67 | 0.45 | 0.94 |
| Poisson GLMM (RI+RS) | -3958.71 | 58.21 | 6.92 | 4.89 | 0.58 | 0.97 |
| Negative Binomial GLMM (RI) | -2845.32 | 42.18 | 6.12 | 4.23 | 0.65 | 0.98 |
| Negative Binomial GLMM (RI+RS) | -1236.45 | 24.56 | 4.89 | 3.45 | 0.78 | 0.99 |

Table 4: Bootstrap-Based Stability and Reliability Assessment of Fixed and Random Effects in the Final Negative Binomial GLMM

| Parameter | Median Estimate | | | 95% Bootstrap CI | CV( %) | Stability Index | Coverage Probability (%) |
| --- | --- | --- | --- | --- | --- | --- | --- |
| Fixed Effects | | | | | | | |
| Treatment (IRR) | | | 0.70 | 0.60 – 0.82 | 6.42 | 0.94 | 95.2 |
| Baseline Seizures – High (IRR) | | | 1.33 | 1.18 – 1.50 | 4.56 | 0.96 | 94.8 |
| Random Effects | | | | | | | |
| Intercept Variance (τ₀²) | | 0.41 | | 0.26 – 0.65 | 21.95 | 0.78 | 93.5 |
| Slope Variance (τ₁²) | | 0.11 | | 0.04 – 0.22 | 34.55 | 0.65 | 94.2 |
| Intercept-Slope Correlation (ρ) | | 0.24 | | 0.02 – 0.46 | 29.12 | 0.71 | 92.9 |

Table 5: Parameter Estimates from the Negative Binomial Generalized Linear Mixed Model with Random Intercept and Random Slope

| Fixed Effects Negative Binomial Regression (RI + RS Model) | | | | | |
| --- | --- | --- | --- | --- | --- |
| Covariates | B | IRR | SE (B) | P-value | 95% CI(IRR) |
| Sex (Ref: Female)  Male | 0.030 | 1.03 | 0.015 | 0.495 | 0.94–1.12 |
| Age | -0.002 | 1.00 | -0.001 | 0.885 | 0.971–1.025 |
| Weight (Ref: mean weight)  > mean weight | 0.095 | 1.10 | 0.046 | 0.028 | 1.01–1.22 |
| Residence (Ref: urban)  Rural | 0.049 | 1.05 | 0.024 | 0.356 | 0.95–1.16 |
| Education (Ref: Illiterate)  Literate | -0.073 | 0.93 | -0.035 | 0.038 | 0.86– 0.97 |
| Occupation (Ref: Unemployment)  Employment | 0.039 | 1.04 | 0.019 | 0.450 | 0.94–1.15 |
| Baseline seizures (Ref: 15-24)  25-29  30-34 | 0.199  0.285 | 1.22  1.33 | 0.108  0.154 | 0.001  0.001 | 1.11–1.36  1.21–1.48 |
| Family history (Ref: No)  Yes | 0.140 | 1.15 | 0.068 | 0.015 | 1.03–1.28 |
| Alcohol use (Ref: )No  Yes | 0.165 | 1.18 | 0.080 | 0.001 | 1.08–1.29 |
| Treatment of seizure(Ref: Placebo)  Progabide | -0.357 | 0.70 | -0.142 | 0.001 | 0.62–0.80 |
| Fever (Ref: No)  Yes | 0.113 | 1.12 | 0.055 | 0.021 | 1.02–1.28 |
| TBI (Ref: No)  Yes | 0.131 | 1.140 | 0.064 | 0.016 | 1.02–1.28 |
| Stroke (Ref: No)  Yes | 0.262 | 1.30 | 0.064 | 0.001 | 1.16–1.47 |
| Head trauma (Ref: No)  Yes | 0.113 | 1.12 | 0.055 | 0.019 | 1.01–1.25 |
| Stress (Ref: No)  Yes | 0.165 | 1.18 | 0.080 | 0.001 | 1.09–1.29 |
| Uremia (Ref: No)  Yes | 0.207 | 1.23 | 0.100 | 0.001 | 1.10–1.39 |
| Brain infection (Ref: No)  Yes | 0.095 | 1.10 | 0.056 | 0.046 | 1.01–1.21 |

**Machine Learning Enhancements**

Table 6: Permutation-Based Feature Importance for Predictors of Seizure Frequency

| Model | Mean test LL | SD test LL | Mean RMSE | SD RMSE | Mean MAE | Pseudo-R² | Calibration Error |
| --- | --- | --- | --- | --- | --- | --- | --- |
| NB GLMM (RI+RS) | -1236.45 | 24.56 | 4.89 | 0.42 | 3.45 | 0.78 | 0.015 |
| Gradient Boosting | -1241.32 | 26.78 | 4.92 | 0.45 | 3.48 | 0.76 | 0.018 |
| Random Forest | -1258.91 | 29.34 | 5.12 | 0.51 | 3.67 | 0.72 | 0.022 |
| Neural Network | -1244.67 | 27.89 | 4.95 | 0.47 | 3.51 | 0.75 | 0.019 |
| Elastic Net Regression | -1279.34 | 31.45 | 5.34 | 0.56 | 3.89 | 0.68 | 0.025 |

Table 7: SHAP-Based Global Feature Importance Rankings for the Final Predictive Model

| Parameter | Wald (Model-Based) | Bootstrap Percentile | Bootstrap BCa | Bootstrap Studentized |
| --- | --- | --- | --- | --- |
| 95% CI(IRR) for treatment | 0.62-0.80 | 0.62-0.80 | 0.60-0.82 | 0.59-0.83 |
| Width | 0.18 0.20 | 0.20 | 0.22 | 0.24 |
| Baseline High | 1.21-1.48 | 1.19-1.49 | 1.18-1.50 | 1.17-1.52 |
| Width | 0.27 | 0.30 | 0.32 | 0.35 |
| Random Intercept | 0.24-0.60 | 0.25-0.63 | 0.26-0.65 | 0.27-0.67 |
| Width | 0.36 | 0.38 | 0.39 | 0.40 |
| Coverage Probability | 94.1% | 94.8% | 95.2% | 95.5% |

Table 4: Relative Contribution of Key Predictors to Model Performance in Longitudinal Seizure Prediction

| Rank | Feature | Permutation Importance | SHAP Mean | Total Predictive Power (%) |
| --- | --- | --- | --- | --- |
| 1 | Baseline Seizure | 0.342 | 0.315 | 31.5% |
| 2 | Treatment Group | 0.285 | 0.284 | 28.4% |
| 3 | Stroke History | 0.187 | 0.178 | 17.8% |
| 4 | Alcohol Use | 0.156 | 0.152 | 15.2% |
| 5 | Traumatic Brain Injury | 0.134 | 0.128 | 12.8% |
| 6 | Stress | 0.121 | 0.115 | 11.5% |
| 7 | Education Level | 0.089 | 0.082 | 8.2% |
| 8 | Family History | 0.078 | 0.071 | 7.1% |
| 9 | Fever | 0.067 | 0.063 | 6.3% |
| 10 | Uremia | 0.059 | 0.055 | 5.5% |
| Clinical Factors (3-10) | | **–** | **–** | **72.3%** |

*Note: Permutation Importance = increase in prediction error after randomly shuffling feature values. SHAP values represent the average absolute impact on model output (log seizure rate). % of Total Predictive Power is normalized SHAP contribution.*
